# Supplementary figures and images for: Cyanidin 3-O glucoside Ameliorate Nickel Chloride-induced VEGF and Interleukin-8 in Retinal Pigment Epithelial Cells
Source: Research Square preprint supplement (doi:10.21203/rs.3.rs-6157291/v1), 2025-04-17

Raw data

**(B)**

**(A)**

Fig 2.


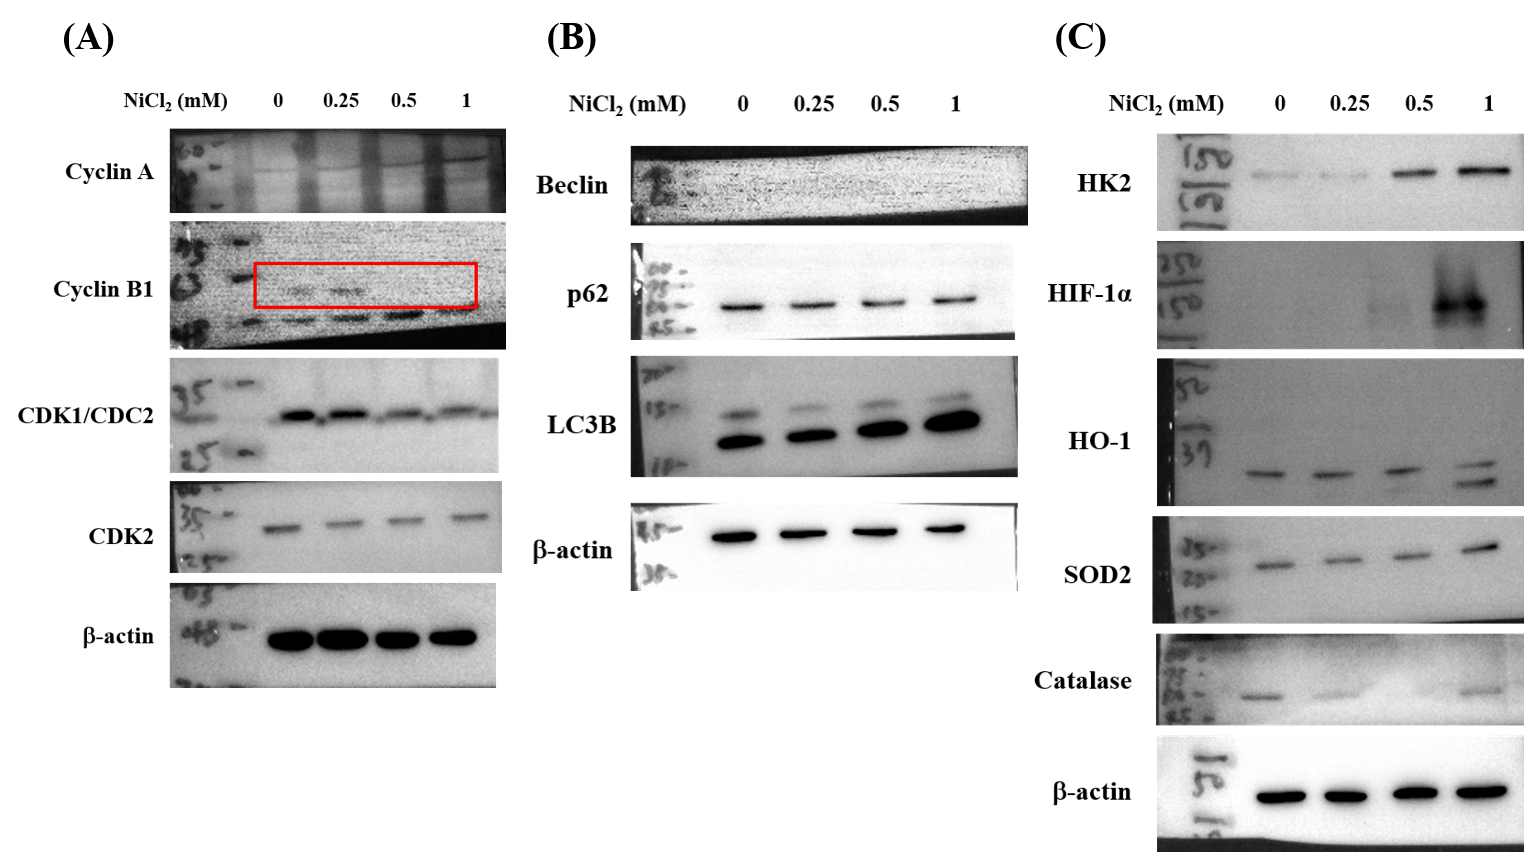

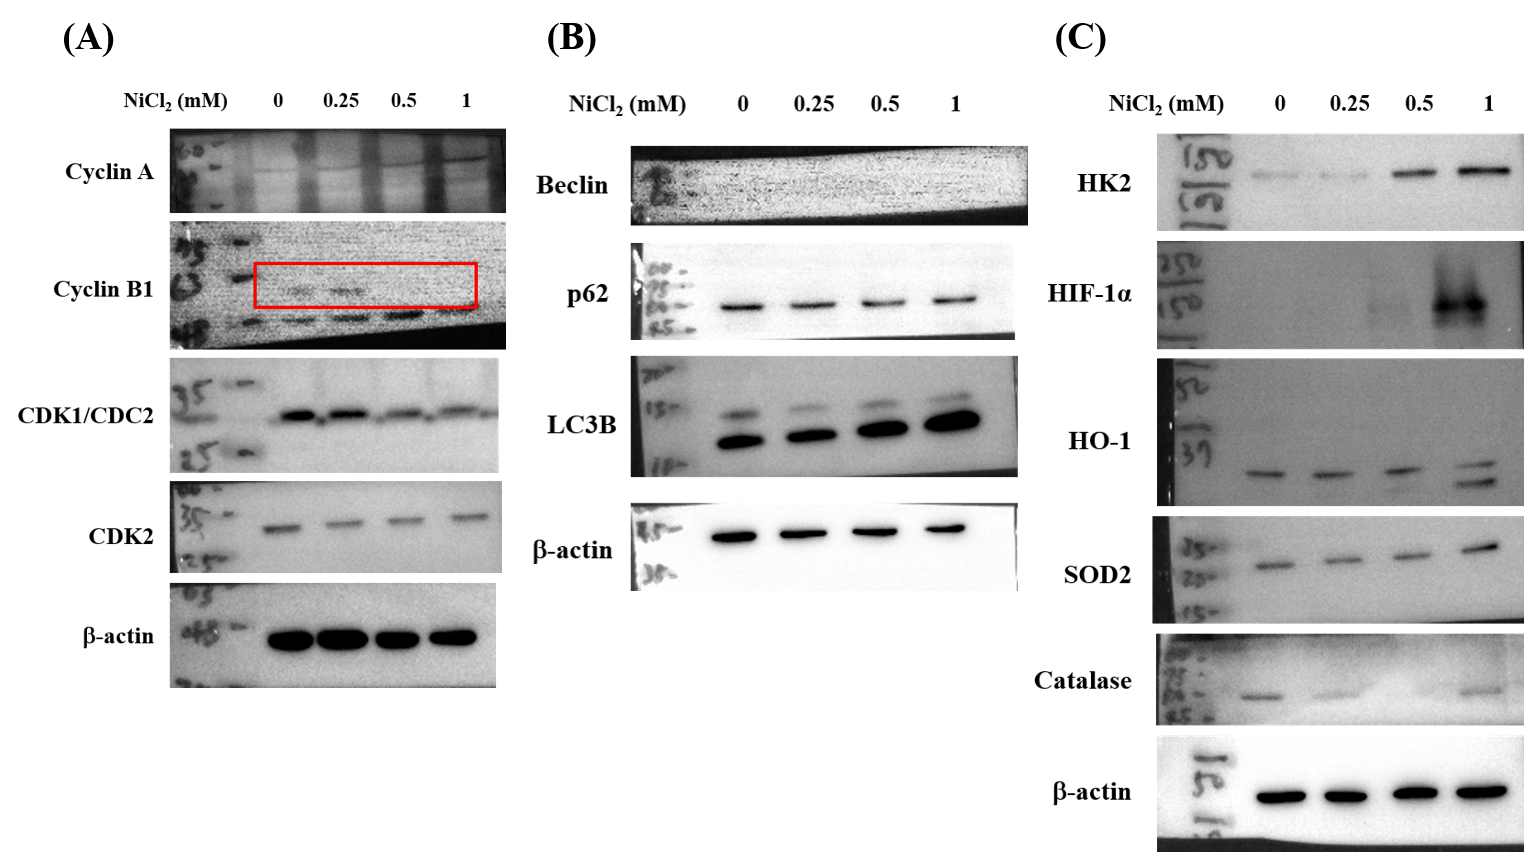


Fig 5. Fig 6B.


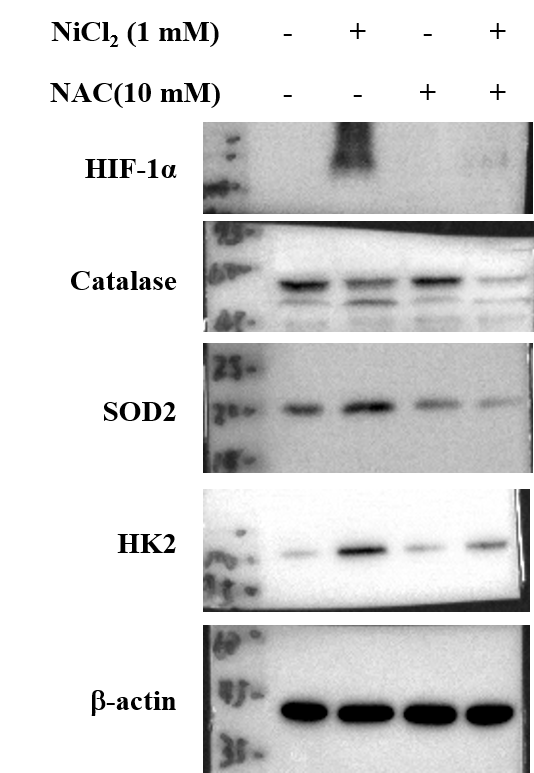

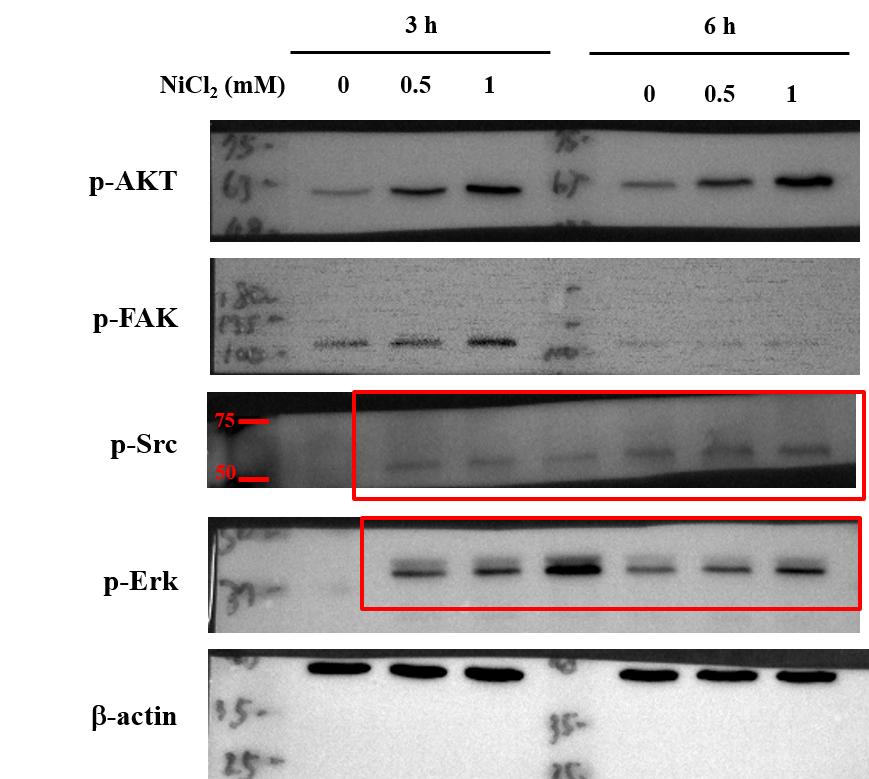


Fig 10.


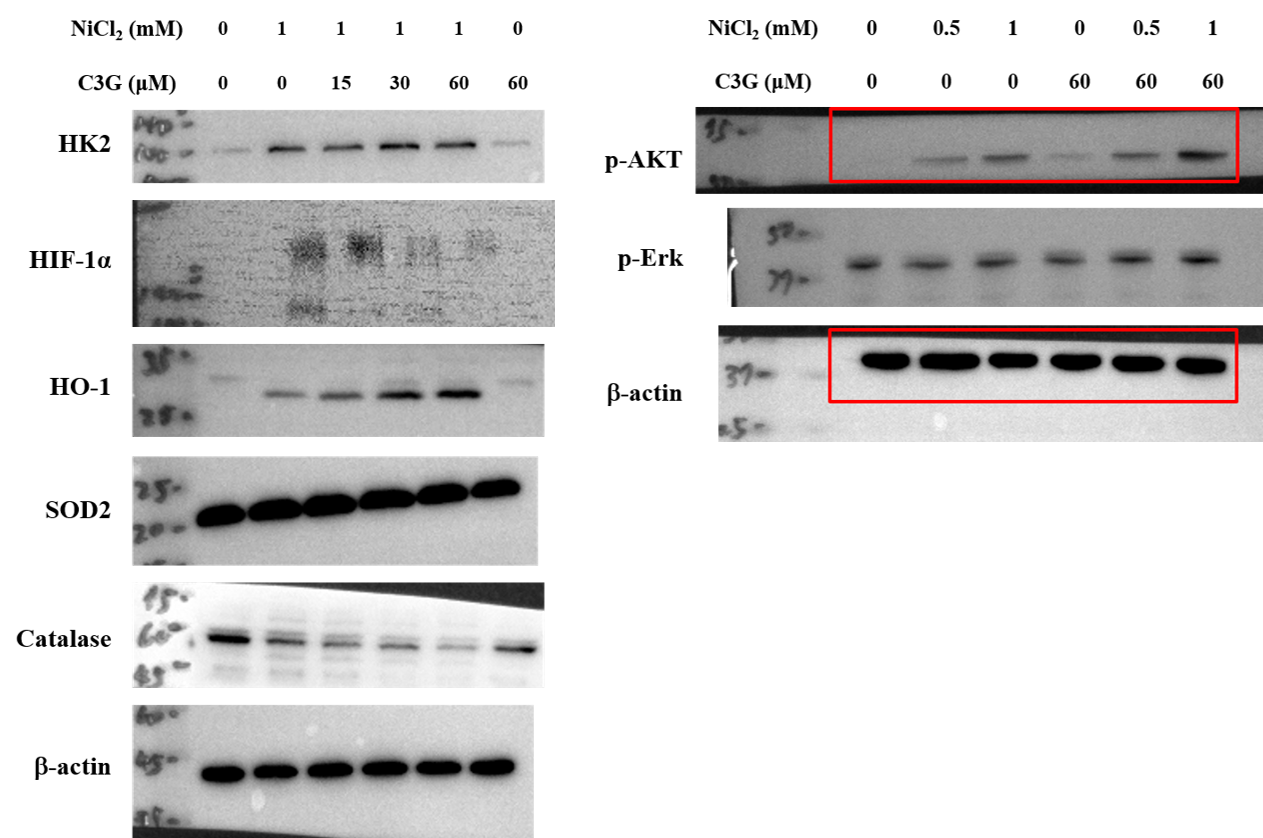

Supplement: Supplementary file 1 [file 830c201b1addf936b3a3bae0.docx]
